# Supplementary material
Source: PubMed Central journal article supplement (PMC2878763)
Supplement: NIHMS194132-supplement-Suppl_figs_1-7.pdf [file NIHMS194132-supplement-Suppl_figs_1-7.pdf]

# Supplemental figure S1

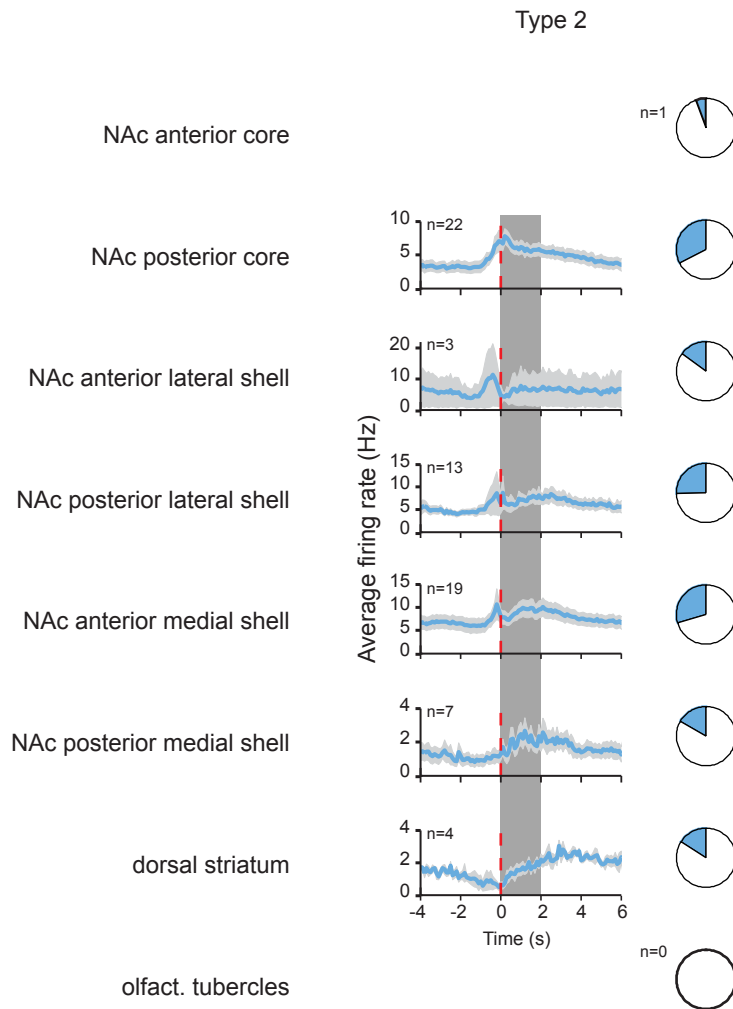

# Supplemental figure S2

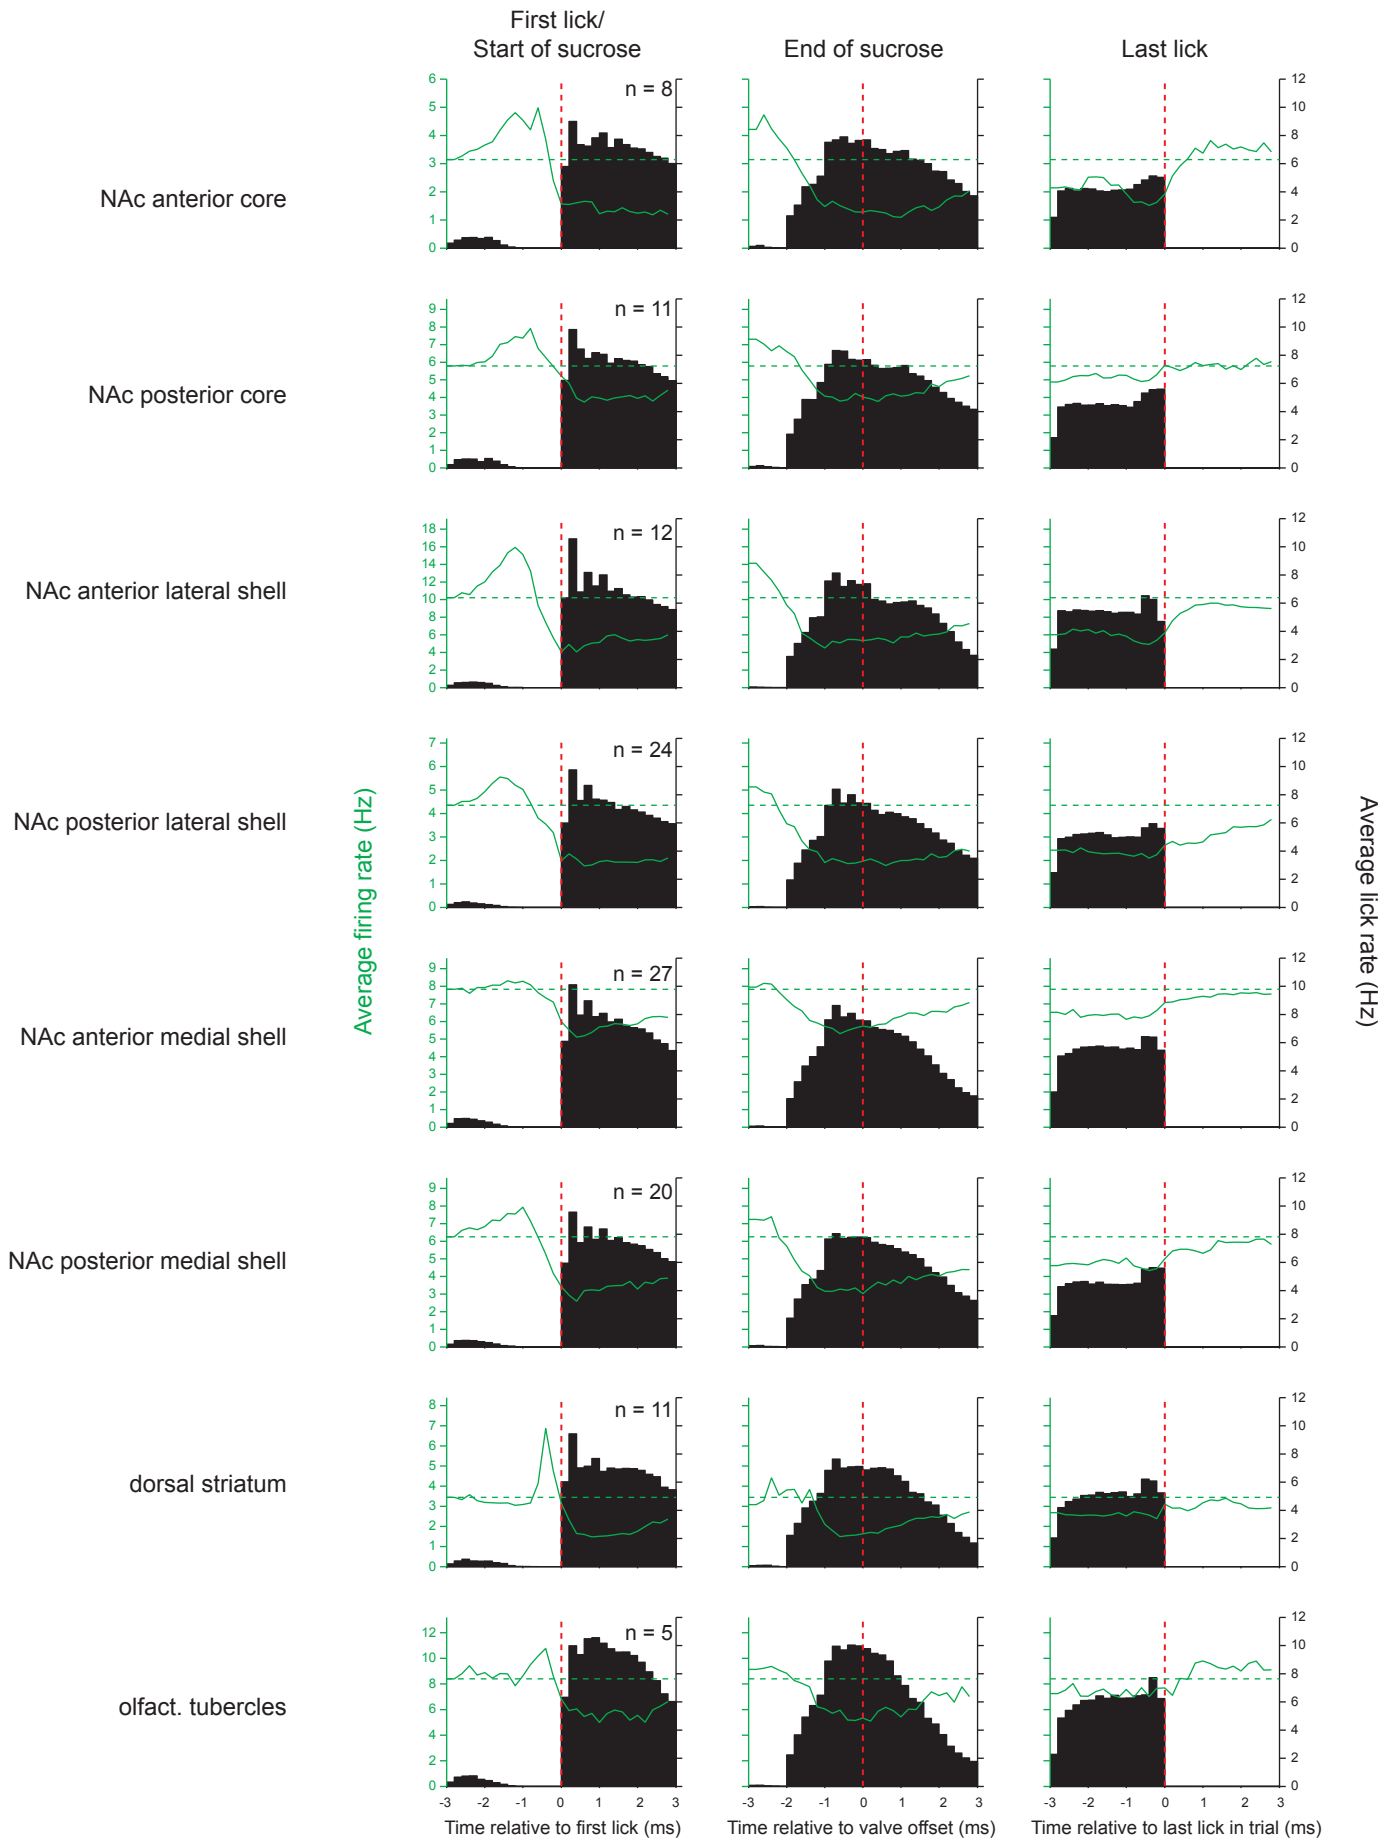

# Supplemental figure S3

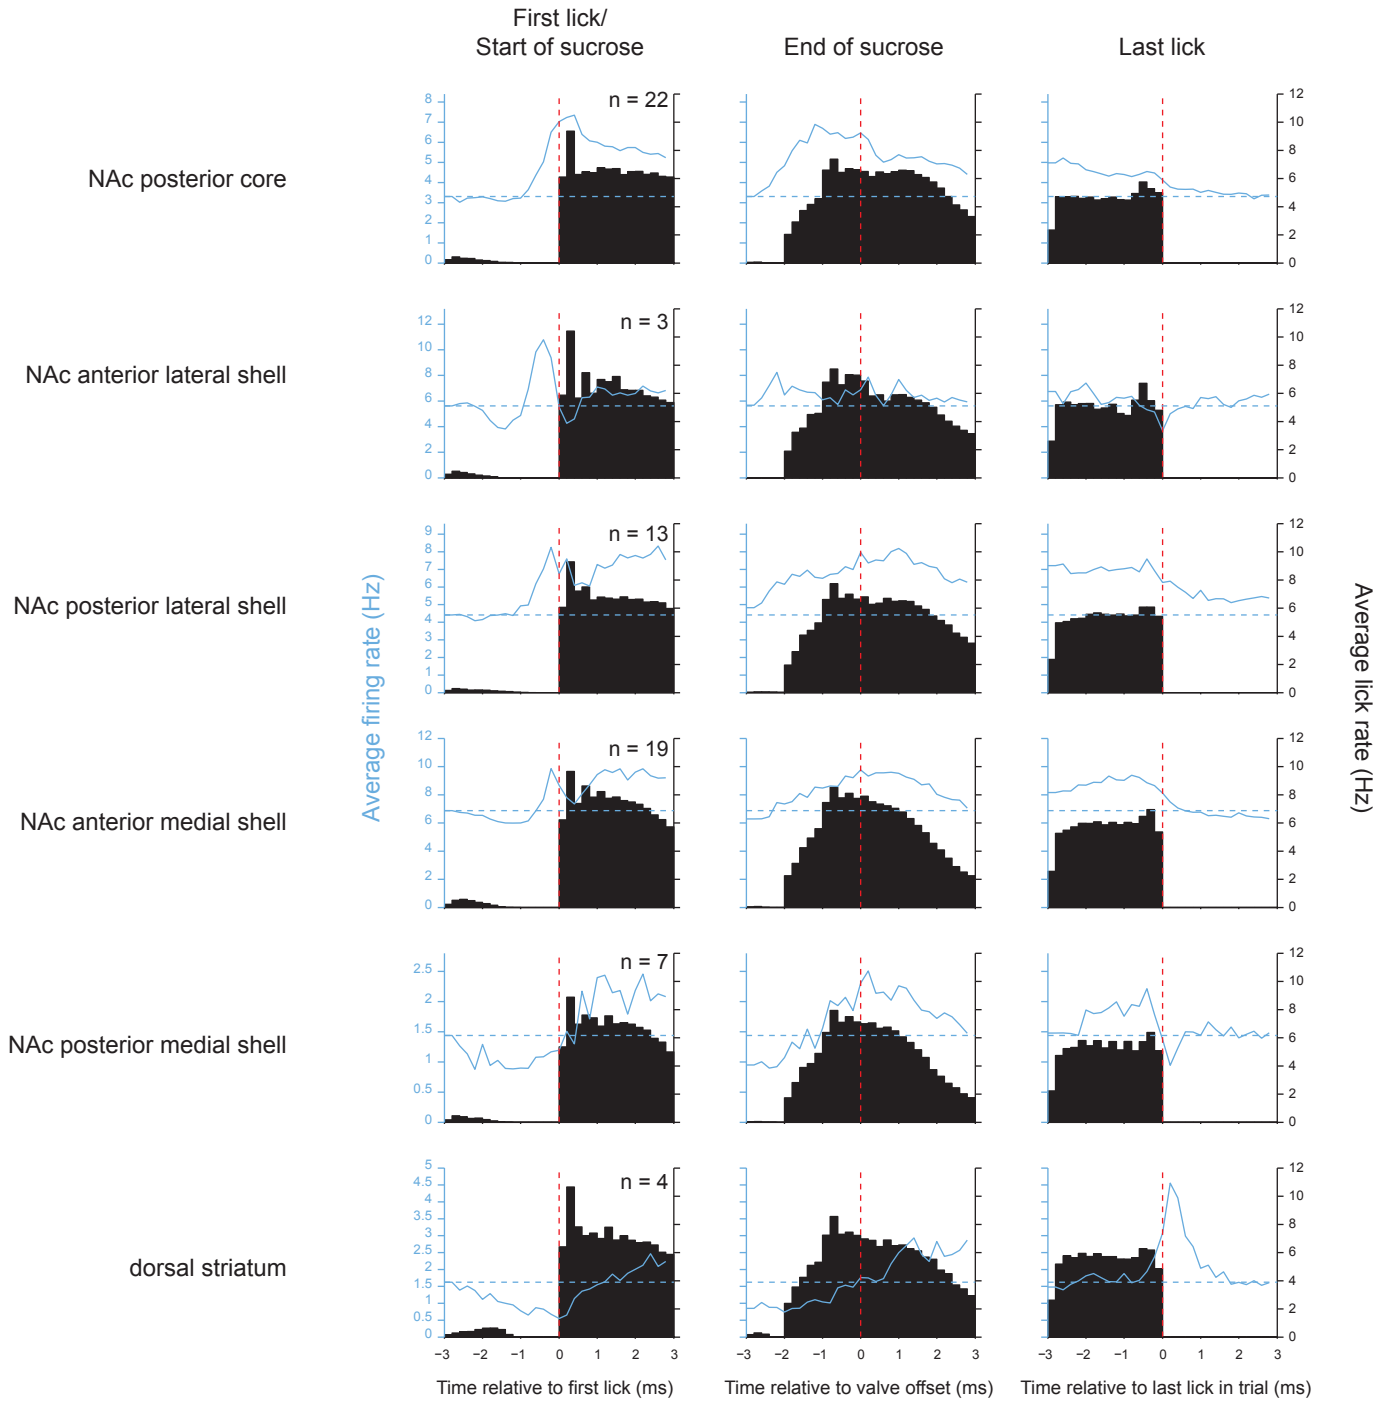

# Supplemental figure S4

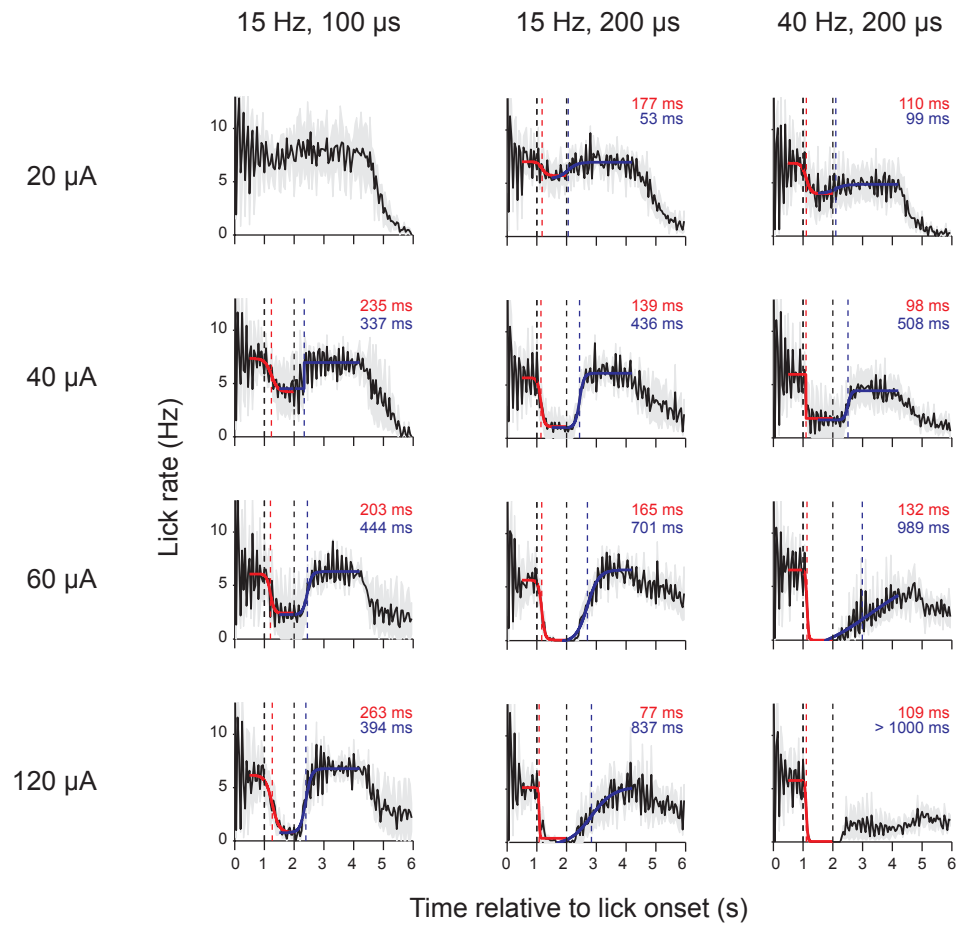

# Supplemental figure S5

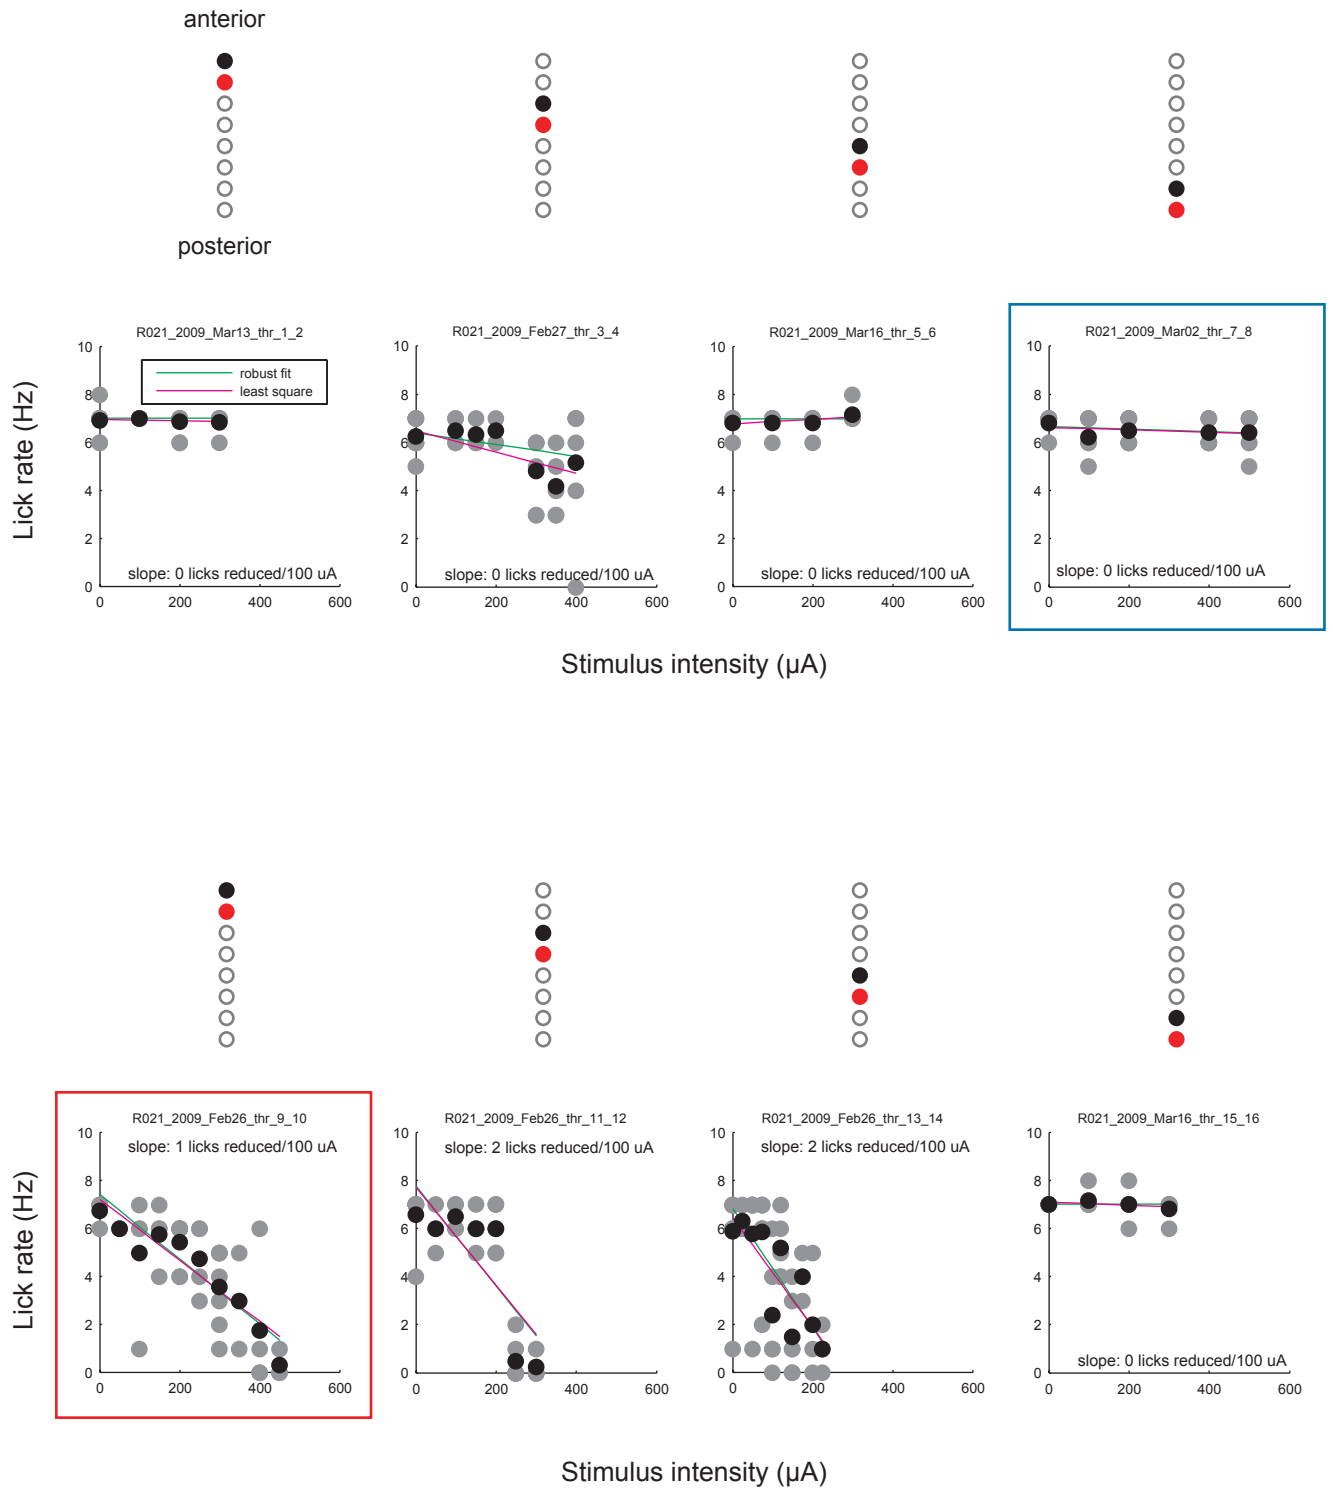

# Supplemental figure S6

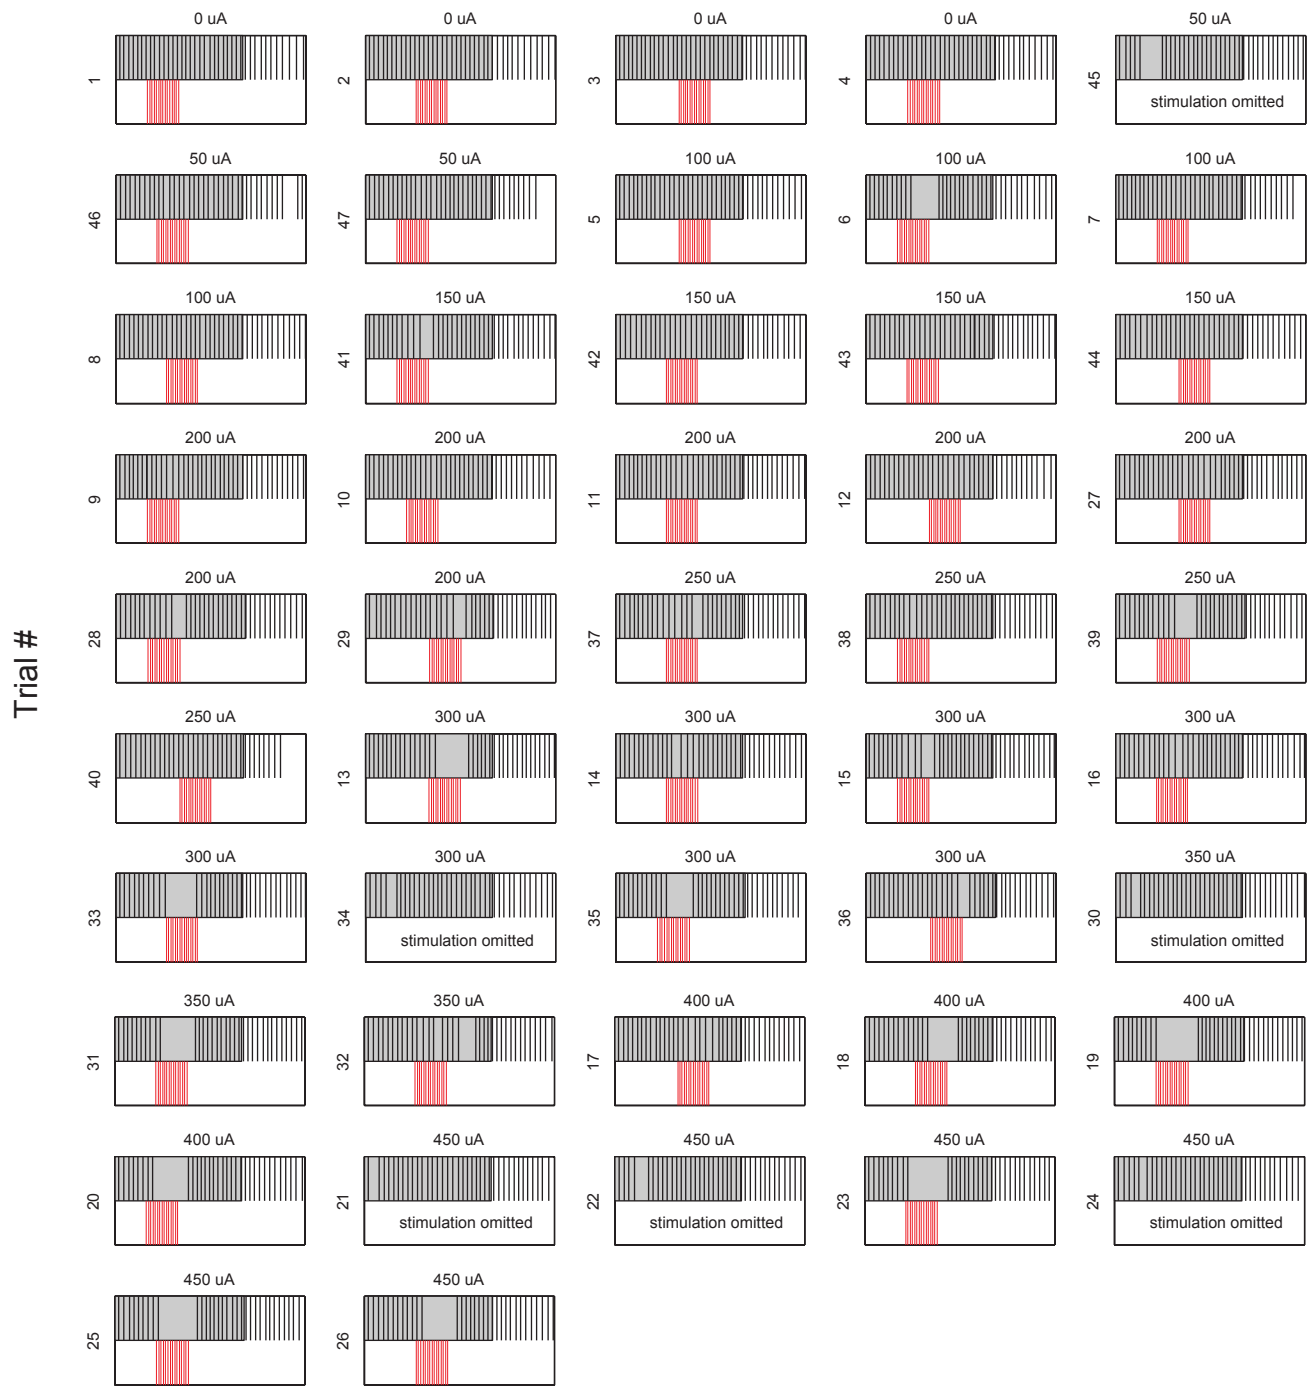

Time per epoch: 6 s
